# Supplementary material for: Phenotypic and Genetic Study of the Presence of Hair Whorls in Pura Raza Español Horses
Source: MDPI journal article supplement (doi:10.3390/ani13182943), 2023-09-16
Supplement: s1 [file s1]

**Table S1.** Generalized Non-Linear Model (GLZ) results using a binomial logit model depending on different risk factors and incidence rate percentage according to hair circular and linear whorl positions.

|           |                 | Gender (N)     |                 |                 | Inbreeding coefficient |                      |                           |                      | Coat color |                   |                       |                    | Birth period       |         |                  |                         |                     |       |
|-----------|-----------------|----------------|-----------------|-----------------|------------------------|----------------------|---------------------------|----------------------|------------|-------------------|-----------------------|--------------------|--------------------|---------|------------------|-------------------------|---------------------|-------|
|           |                 | p-value        | ♂<br>(n:15,781) | ♀<br>(n:27,616) | p-value                | <0.125<br>(n:39,171) | 0.125-0.1875<br>(n:2,954) | >0.1875<br>(n:1,272) | p-value    | Bay<br>(n:17,015) | Chestnut<br>(n:3,504) | Black<br>(n:5,443) | Grey<br>(n:17,435) | p-value | ≤2001<br>(n:634) | 2002-2011<br>(n:12,741) | ≥2012<br>(n:30,022) |       |
| Head      | circular whorls | Position       |                 |                 |                        |                      |                           |                      |            |                   |                       |                    |                    |         |                  |                         |                     |       |
|           |                 | Top right      | 0.782           | 2.28            | 2.29                   | 0.055                | 2.32                      | 2.27                 | 1.34       | 0.029             | 2.51                  | 2.60               | 2.11               | 2.07    | 0.062            | 1.58                    | 2.07                | 2.40  |
|           |                 | Top center     | 0.449           | 25.21           | 24.65                  | 0.753                | 24.88                     | 24.48                | 24.92      | <0.001            | 24.44                 | 24.94              | 22.38              | 26.01   | <0.001           | 15.14                   | 22.20               | 26.18 |
|           |                 | Top left       | 0.903           | 3.99            | 3.98                   | 0.236                | 4.01                      | 4.06                 | 3.07       | 0.188             | 4.24                  | 3.85               | 3.91               | 3.77    | 0.020            | 2.05                    | 3.92                | 4.05  |
|           |                 | Between eyes   | <0.001          | 55.54           | 52.98                  | 0.009                | 53.81                     | 53.56                | 57.94      | 0.015             | 53.78                 | 52.85              | 56.07              | 53.58   | <0.001           | 42.59                   | 57.30               | 52.71 |
|           |                 | Low right      | <0.001          | 45.34           | 51.69                  | 0.880                | 49.27                     | 50.71                | 49.61      | <0.001            | 46.40                 | 40.81              | 46.46              | 54.92   | <0.001           | 10.10                   | 40.20               | 54.14 |
|           |                 | Low center     | <0.001          | 16.87           | 19.80                  | 0.827                | 18.80                     | 18.08                | 18.32      | <0.001            | 19.66                 | 19.04              | 18.81              | 17.75   | <0.001           | 13.25                   | 18.30               | 19.04 |
|           | Low left        | <0.001         | 47.22           | 53.79           | 0.511                  | 51.21                | 53.22                     | 53.07                | <0.001     | 48.20             | 42.47                 | 48.10              | 57.36              | <0.001  | 10.10            | 41.60                   | 56.44               |       |
|           | linear whorls   | Top right      | 0.609           | 0.09            | 0.09                   | 0.387                | 0.09                      | 0.03                 | 0.16       | 0.608             | 0.09                  | 0.09               | 0.15               | 0.08    | 0.064            | 0.00                    | 0.06                | 0.11  |
|           |                 | Top center     | <0.001          | 1.18            | 1.56                   | 0.575                | 1.41                      | 1.46                 | 1.81       | 0.031             | 1.32                  | 1.34               | 1.16               | 1.63    | 0.074            | 0.79                    | 1.30                | 1.49  |
|           |                 | Top left       | 0.605           | 0.16            | 0.19                   | 0.818                | 0.18                      | 0.24                 | 0.16       | 0.106             | 0.17                  | 0.11               | 0.09               | 0.23    | 0.098            | 0.00                    | 0.17                | 0.19  |
|           |                 | Between eyes   | 0.647           | 2.60            | 2.70                   | 0.007                | 2.61                      | 2.88                 | 3.70       | <0.001            | 2.41                  | 1.74               | 2.44               | 3.17    | 0.108            | 42.50                   | 57.30               | 52.71 |
|           |                 | Low right      | 0.821           | 3.40            | 3.49                   | 0.922                | 3.45                      | 3.52                 | 3.70       | <0.001            | 3.03                  | 3.23               | 3.51               | 3.91    | <0.001           | 2.84                    | 5.54                | 2.59  |
|           |                 | Low center     | <0.001          | 2.77            | 4.10                   | 0.046                | 3.54                      | 4.06                 | 4.87       | <0.001            | 3.52                  | 2.34               | 3.05               | 4.14    | <0.001           | 2.68                    | 3.03                | 3.88  |
| Low left  |                 | 0.541          | 3.55            | 3.57            | 0.209                  | 3.51                 | 3.89                      | 4.40                 | <0.001     | 3.12              | 3.31                  | 3.51               | 4.06               | <0.001  | 2.84             | 5.60                    | 2.72                |       |
| Body-neck | Circular whorls | Right          | <0.001          | 88.61           | 89.54                  | <0.001               | 88.99                     | 90.69                | 92.37      | <0.001            | 88.53                 | 89.50              | 87.40              | 90.36   | <0.001           | 56.78                   | 89.63               | 89.70 |
|           |                 | Center         | 0.534           | 86.49           | 85.77                  | 0.091                | 85.97                     | 85.91                | 87.97      | <0.001            | 85.42                 | 87.53              | 84.97              | 86.65   | <0.001           | 51.26                   | 83.85               | 87.69 |
|           |                 | Left           | <0.001          | 88.66           | 89.67                  | <0.001               | 89.08                     | 90.99                | 92.37      | <0.001            | 88.50                 | 89.36              | 87.54              | 90.63   | <0.001           | 57.10                   | 89.65               | 89.84 |
|           | linear whorls   | Right          | 0.436           | 43.00           | 43.85                  | <0.001               | 42.99                     | 48.51                | 50.00      | <0.001            | 40.91                 | 37.41              | 38.18              | 49.09   | <0.001           | 29.02                   | 39.13               | 45.77 |
|           |                 | Center         | 0.002           | 57.02           | 55.50                  | <0.001               | 55.67                     | 58.70                | 61.64      | <0.001            | 55.35                 | 55.79              | 53.63              | 57.55   | <0.001           | 42.27                   | 56.71               | 56.06 |
|           |                 | Left           | 0.207           | 43.03           | 43.87                  | <0.001               | 42.98                     | 48.44                | 50.16      | <0.001            | 40.86                 | 37.41              | 38.03              | 49.17   | <0.001           | 29.18                   | 39.02               | 45.80 |
| Limbs     | circular whorls | Right forelimb | <0.001          | 2.37            | 1.17                   | 0.014                | 1.62                      | 1.76                 | 0.71       | 0.080             | 1.79                  | 1.28               | 1.60               | 1.49    | 0.009            | 0.63                    | 1.81                | 1.54  |
|           |                 | Left forelimb  | <0.001          | 2.17            | 1.17                   | 0.082                | 1.55                      | 1.69                 | 0.87       | 0.668             | 1.60                  | 1.34               | 1.53               | 1.51    | 0.081            | 1.26                    | 1.71                | 1.47  |
|           |                 | Right hindlimb | <0.001          | 9.08            | 8.21                   | 0.050                | 8.47                      | 9.85                 | 7.15       | <0.001            | 8.00                  | 7.39               | 7.62               | 9.54    | <0.001           | 3.94                    | 11.90               | 7.19  |
|           |                 | Left hindlimb  | <0.001          | 9.24            | 8.20                   | 0.025                | 8.54                      | 9.68                 | 7.23       | <0.001            | 8.00                  | 7.65               | 7.81               | 9.57    | <0.001           | 3.94                    | 12.03               | 7.21  |
|           | linear whorls   | Right forelimb | <0.001          | 0.91            | 0.46                   | 0.397                | 0.62                      | 0.75                 | 0.393      | 0.432             | 0.59                  | 0.63               | 0.81               | 0.6     | <0.001           | 0.47                    | 0.90                | 0.51  |
|           |                 | Left forelimb  | <0.001          | 0.83            | 0.43                   | 0.237                | 0.56                      | 0.81                 | 0.47       | 0.873             | 0.55                  | 0.57               | 0.64               | 0.59    | 0.002            | 0.79                    | 0.75                | 0.50  |

|  |                |       |      |      |       |      |      |      |        |      |      |      |      |        |      |       |      |
|--|----------------|-------|------|------|-------|------|------|------|--------|------|------|------|------|--------|------|-------|------|
|  | Right hindlimb | 0.002 | 7.52 | 6.93 | 0.050 | 7.10 | 8.23 | 6.13 | <0.001 | 6.36 | 6.08 | 6.12 | 8.44 | <0.001 | 3.31 | 10.01 | 6.01 |
|  | Left hindlimb  | 0.001 | 7.61 | 6.98 | 0.087 | 7.17 | 8.09 | 6.21 | <0.001 | 6.39 | 6.16 | 6.41 | 8.46 | <0.001 | 2.10 | 10.18 | 6.04 |

**Table S2.** Generalized Non-Linear Model (GLZ) results using a multinomial logit model depending on different risk factors and incidence rate percentage according to the number of circular and linear hair whorls.

|           |                 | Gender |         |            | Inbreeding coefficient |         |              | Coat color |           |         |            | Birth period |           |            |         |           |            |            |       |
|-----------|-----------------|--------|---------|------------|------------------------|---------|--------------|------------|-----------|---------|------------|--------------|-----------|------------|---------|-----------|------------|------------|-------|
|           |                 | GLZ    | ♂       | ♀          | GLZ                    | <0.125  | 0.125-0.1875 | >0.1875    | GLZ       | Bay     | Chestnut   | Black        | Grey      | GLZ        | ≤2001   | 2002-2011 | ≥2012      |            |       |
|           |                 | Number | p-value | (n:15,781) | (n:27,616)             | p-value | (n:39,171)   | (n:2,954)  | (n:1,272) | p-value | (n:17,015) | (n:3,504)    | (n:5,443) | (n:17,435) | p-value | (n:634)   | (n:12,741) | (n:30,022) |       |
| Head      | circular whorls | 0      | <0.001  | 4.17       | 4.22                   | 0.626   | 4.24         | 4.10       | 3.381     | <0.001  | 4.13       | 5.37         | 3.91      | 4.14       | <0.001  | 30.92     | 4.23       | 3.63       |       |
|           |                 | 1      |         | 37.62      | 31.77                  |         | 34.01        | 32.74      | 33.02     |         | 36.37      | 39.70        | 36.89     | 29.38      |         | 47.48     | 42.31      | 30.04      |       |
|           |                 | 2      |         | 13.54      | 13.68                  |         | 13.58        | 14.12      | 14.07     |         | 13.69      | 14.93        | 14.13     | 13.16      |         | 10.41     | 14.10      | 13.50      |       |
|           |                 | 3      |         | 28.54      | 33.10                  |         | 31.35        | 32.09      | 32.70     |         | 30.04      | 26.03        | 30.44     | 34.20      |         | 6.47      | 25.91      | 34.32      |       |
|           |                 | 4      |         | 9.15       | 10.05                  |         | 9.76         | 9.45       | 9.20      |         | 9.29       | 8.45         | 8.76      | 10.69      |         | 2.37      | 7.51       | 10.81      |       |
|           |                 | >4     |         | 6.98       | 7.19                   |         | 7.06         | 7.52       | 7.63      |         | 6.48       | 5.54         | 5.86      | 8.44       |         | 2.37      | 5.94       | 7.71       |       |
|           | linear whorls   | lineal | 0       | 0.052      | 91.84                  | 91.05   | 0.043        | 91.45      | 90.56     | 89.70   | <0.001     | 91.73        | 92.84     | 92.39      | 90.31   | <0.001    | 92.74      | 89.79      | 91.96 |
|           |                 |        | 1       |            | 4.21                   | 4.99    |              | 4.60       | 5.76      | 5.82    |            | 4.73         | 3.28      | 3.60       | 5.33    |           | 3.943      | 4.26       | 4.92  |
|           |                 |        | 2       |            | 3.21                   | 3.23    |              | 3.24       | 2.78      | 3.62    |            | 2.83         | 3.34      | 3.29       | 3.56    |           | 2.21       | 5.11       | 2.44  |
|           |                 |        | >2      |            | 0.75                   | 0.73    |              | 0.72       | 0.91      | 0.87    |            | 0.72         | 0.54      | 0.72       | 0.80    |           | 1.11       | 0.84       | 0.68  |
| Body-neck | Circular whorls | 0      | 0.222   | 4.78       | 4.58                   | <0.001  | 4.79         | 3.79       | 2.52      | <0.001  | 4.87       | 4.28         | 5.51      | 4.25       | <0.001  | 36.59     | 4.88       | 3.88       |       |
|           |                 | 1-2    |         | 7.58       | 7.57                   |         | 7.61         | 7.31       | 7.08      |         | 8.34       | 6.94         | 8.84      | 6.56       |         | 9.15      | 7.28       | 7.67       |       |
|           |                 | 3-4    |         | 15.94      | 15.90                  |         | 16.07        | 14.15      | 15.17     |         | 16.95      | 19.86        | 15.53     | 14.23      |         | 10.10     | 15.40      | 16.26      |       |
|           |                 | 5-6    |         | 20.28      | 20.10                  |         | 20.28        | 18.82      | 19.65     |         | 20.36      | 20.58        | 21.28     | 19.55      |         | 13.09     | 19.79      | 20.47      |       |
|           |                 | 7-8    |         | 18.48      | 18.84                  |         | 18.76        | 17.87      | 19.03     |         | 18.80      | 18.64        | 18.57     | 18.69      |         | 11.36     | 20.05      | 18.30      |       |
|           |                 | 9-10   |         | 13.83      | 13.83                  |         | 13.66        | 15.67      | 14.94     |         | 13.33      | 12.93        | 13.39     | 14.64      |         | 9.46      | 14.29      | 13.73      |       |
|           |                 | >10    |         | 19.10      | 19.18                  |         | 18.83        | 22.38      | 21.62     |         | 17.36      | 16.78        | 16.88     | 22.09      |         | 10.25     | 18.31      | 19.70      |       |
|           | Linear whorls   | 0      | <0.001  | 37.79      | 38.78                  | <0.001  | 38.94        | 34.39      | 31.53     | <0.001  | 39.32      | 39.90        | 41.71     | 36.21      | <0.001  | 51.42     | 37.64      | 38.47      |       |
|           |                 | 1-2    |         | 17.58      | 16.71                  |         | 16.96        | 17.64      | 17.61     |         | 18.37      | 21.20        | 18.41     | 14.45      |         | 15.14     | 19.91      | 15.85      |       |
|           |                 | 3-4    |         | 11.91      | 12.70                  |         | 12.29        | 13.00      | 14.94     |         | 11.88      | 10.42        | 10.86     | 13.81      |         | 11.67     | 12.58      | 12.35      |       |
|           |                 | 5-6    |         | 15.23      | 15.69                  |         | 15.53        | 15.34      | 15.57     |         | 15.08      | 13.76        | 12.95     | 17.10      |         | 9.78      | 14.00      | 16.29      |       |
|           |                 | 7-8    |         | 10.53      | 9.90                   |         | 10.06        | 10.94      | 10.38     |         | 9.43       | 9.59         | 9.774     | 11.04      |         | 5.52      | 8.55       | 10.90      |       |
|           |                 | 9-10   |         | 4.35       | 3.96                   |         | 3.94         | 5.45       | 5.90      |         | 3.66       | 3.05         | 4.04      | 4.76       |         | 3.47      | 4.12       | 4.11       |       |
|           |                 | >10    |         | 2.61       | 2.27                   |         | 2.27         | 3.25       | 4.09      |         | 2.26       | 2.08         | 2.26      | 2.63       |         | 3.00      | 3.20       | 2.04       |       |
| Limbs     | Cir-<br>cular   | 0      | <0.001  | 88.02      | 90.11                  | 0.004   | 89.40        | 87.85      | 91.35     | <0.001  | 89.82      | 90.58        | 90.21     | 88.39      | <0.001  | 94.80     | 85.57      | 90.84      |       |
|           |                 | 1      |         | 1.92       | 1.41                   |         | 1.60         | 1.73       | 1.26      |         | 1.62       | 1.60         | 1.56      | 1.58       |         | 0.79      | 2.14       | 1.38       |       |

|               |    |        |       |       |       |       |       |       |        |       |       |       |       |        |       |       |       |
|---------------|----|--------|-------|-------|-------|-------|-------|-------|--------|-------|-------|-------|-------|--------|-------|-------|-------|
|               | 2  |        | 9.37  | 8.06  |       | 8.49  | 9.72  | 7.31  |        | 8.01  | 7.31  | 7.79  | 9.54  |        | 4.26  | 11.63 | 7.32  |
|               | >2 |        | 0.68  | 0.42  |       | 0.52  | 0.71  | 0.08  |        | 0.56  | 0.51  | 0.44  | 0.49  |        | 0.16  | 0.66  | 0.46  |
| Linear whorls | 0  |        | 91.34 | 92.27 |       | 91.98 | 90.86 | 92.93 |        | 92.78 | 92.95 | 92.78 | 90.60 |        | 95.90 | 88.70 | 93.23 |
|               | 1  | <0.001 | 0.98  | 0.96  | 0.038 | 0.99  | 0.68  | 0.87  | <0.001 | 0.99  | 0.94  | 0.92  | 0.96  | <0.001 | 0.63  | 1.41  | 0.79  |
|               | 2  |        | 7.28  | 6.49  |       | 6.70  | 8.06  | 6.13  |        | 5.91  | 5.79  | 5.97  | 8.08  |        | 3.47  | 9.42  | 5.73  |
|               | >2 |        | 0.41  | 0.27  |       | 0.32  | 0.41  | 0.08  |        | 0.32  | 0.31  | 0.33  | 0.32  |        | 12.00 | 0.48  | 0.26  |
